# Supplementary material
Source: PubMed Central journal article supplement (PMC2000513)
Supplement: pnas_0704105104_4.pdf [file pnas_0704105104_4.pdf]

**L1L** MERGGFHG YRKL SVNNTTPSP PGLAANFLMAEGSMR PPEFNQPNKTSNGGEEECT **REC**  
**LEC1** MERGAPFSHYQLPKSISELNLDQHSNNPTMPTSSVVVAGAGDKNNGIVVVQQPPCVAR **REC**  
**KdLEC1** MKWTDINMKLPGDGSSNGATVPAGDSECI **REC**  
 At2g47810 MAGNYHSFQNP IPRYQNYNFGSSSSNHQHEHDGLVVVVVEDQQQEESMMV **REC**  
 At1g09030 **MTDE**  
 At3g53340 MAESQTGGGGGSHESGGDQSPRSLN **REC**  
 At2g38880 MADTPSSPAGDGGESG-----SV **REC**  
 At5g47640 MGDSDRDSGGGQNGNNQNGQSSLS **REC**  
 At4g14540 MADSDNDSGGHKDGGN-----AST **REC**  
 At2g13570 MTEESPEEDHGSPGVAETNPGSPSSKTNNNN-----NK **REC**

**L1L** DRFMP IANVIRIMRILPAHAKISDDSKETIQECVSEYISFITGEANERCQREQRKTITA  
**LEC1** DQYMP IANVIRIMRKLTPSHAKISDDAKETIQECVSEYISFVTGEANERCQREQRKTITA  
**KdLEC1** DRFMP IANVIRIMKILP SHAKISDDAKETIQECVSEYIGFITSEANERCQHEQRKTITA  
 At2g47810 DRLLP IANVGRIMKNILPANAKVSKAEKBTMQECVSEFISFVTGEASDKCHKRKRKTVNG  
 At1g09030 DRLLP IANVGRIMKQILPSNAKISKEAKQTVQECATEFISFVTCEASEKCHRENKRKTVNG  
 At3g53340 DRFLP IANISRIMKRLGPLNGKIAKDAKBTMQECVSEFISFVTSEASDKCQEKKRKTING  
 At2g38880 DRYLP IANISRIMKKALPPNGKIGKDAKBTMQECVSEFISFITSEASDKCQEKKRKTVNG  
 At5g47640 DRFLP IANVSRIMKKALPANAKISKDAKBTMQECVSEFISFVTGEASDKCQEKKRKTING  
 At4g14540 DRFLP IANVSRIMKKALPANAKISKDAKBTMQECVSEFISFITGEASDKCQEKKRKTING  
 At2g13570 DRFLP IANVGRIMKKVLPNGKISKDAKETVQECVSEFISFVTGEASDKCOREKRKTING

**L1L** EDVLWAMSKLGFDDYIEPLTLYLHRYRELEGERGVSCSAGSVSMTNGLVVKRPNGMTBEY  
**LEC1** EDILWAMSKLGFDDNYVDPLTVFINRYREIETDRGSALRGEPPSLRQTYGGNGIGFHGSPH  
**KdLEC1** EDVLWAMSKLGFDSVPAPIQGHGGZ  
 At2g47810 DDICWAMANLGFDDYAAQLKXYLHRYRVLGEKPN-----HHGKGGP  
 At1g09030 DDIW WALSTLGLDNYADAVGRHLHRYREAEERER-----TEHNKGSN  
 At3g53340 DDLWAMATLGFEDYIDPLKVYLMRYREMEGDTKSGSGKGESSAKRDGQPSQVSQFSQVP  
 At2g38880 DDLWAMATLGFEDYLEPLKIYLARYRELEGDNKGSGKSGDGSNRDAGGGVSGEEMPSW  
 At5g47640 DDLWAMATLGFEDYVEPLKVYLQRFREI EGERTGLGRPQTGGEVGEHQRDVADGGGFY  
 At4g14540 DDLWAMATLGFEDYVEPLKVYLQKYREVEGEKTTTAGRQGDKEGGGGGGAGSGSGGAP  
 At2g13570 DDIIWAITLGFEDYVAPLKVYLQKYRDETEGEKVNSPKQQQQRQQQQIQQQNHNYQFQ

**L1L** GAYGPVPGIHMAYHYRHQNGFVFSGNEPNSKMSGSSSSGASGARVEVFPTQQHKY  
**LEC1** GLPPP GPYGYGMLDQSMVMGGGRYYQNGSSGQDESSVGGGSSSSSINGMPAFDHYGQYK  
**KdLEC1**  
 At2g47810 KSSPDN  
 At1g09030 DSGNEKETN--TRSDVQNQSTK F IRVVEKGSSSSAR  
 At3g53340 QQGSFSQGPYGNSSQLRFGNSIEHLEVLMSSTRTLFITIFRDSTMPVVSLENLSDPLSIDM  
 At2g38880  
 At5g47640 GGGGMQYHQHHQFLHQQNHMYGATGGGSDSGGGAASGRTRT  
 At4g14540 MYGGGMVTTMGHQFSSHFS  
 At2g13570 EQDQNNNNMSCTSYISHHHSPFLPVDHQFPFNIAFSPKSLQKQFPQOHDNNIDSIHV
