# Supplementary material
Source: PubMed Central journal article supplement (PMC2000513)
Supplement: pnas_0704105104_8.pdf [file pnas_0704105104_8.pdf]

*A. thaliana* GAATGTTGTCCTCCGAGTACATCAGCTTCGTGACCGGTGAAGCCAACGAGCG  
*K. marmorata* GAGTGCCTGTTCGGAGTATATCAGCTTTCATCACGAGCGAGGCGAACGAGCG  
*K. rhombopilosa* GAAATGCGTGTCCGAGTACATCAGCTTTCATCACAGCGAGGCGAATGAGCG  
*K. tomentosa* GAAATGCGTGTCCGAGTACATCAGCTTTCATCACGAGCGAAGCCAACGAGCG  
*K. daigremontiana* GAGTGCCTGTTCGGAGTATATCGCTTTCATCACGAGCGAGGCGAACGAGCG  
*K. tubiflora* GAGTGCCTGTTCGGAGTATATCGCTTTCATCACGAGCGAGGCGAACGAGCG  
*K. beauverdii* GAGTGCCTGTTCGGAGTATATCGCTTTCATCACGAGCGAGGCGAACGAGCG  
*K. gastronisbonnieri* GAGTGCCTGTTCGGAGTATATCGCTTTCATCACGAGCGAGGCGAACGAGCG  
*K. streptantha* GAGTGCCTGTTCGGAGTACATCAGCTTTCATCACTAGCGAGGCGAATGAGCG  
*K. pinnata* CAGTGCCTGTTCGGAGTATATCTGCTTTCATCACGAGCGAGGCGAACGAGCG  
*K. prolifera* GAGTGCCTGTTCGGAGTATATCGCTTTCATCACGGGCGAGGCGAACGAGCG  
*K. thyrsoflora* GAGTGCCTGTTCGGAGTATATCAGCTTTCATCACGAGCGAGGCGAACGAGCG

*A. thaliana* TTGCCAACGTGAGCAACCTAAGACCATAACTGCTGAAGATATCTCTTTGGG  
*K. marmorata* GTGCCATCATGAGCAGAGGAAGACCATCACTGCTGAGGACGTGCTATGGG  
*K. rhombopilosa* GTGCCAGCAGGAGCAGAGGAAGACCATCAGGGCCGAGGACGTGCTTTGGG  
*K. tomentosa* GTGCCAGCAGGAACAGAGGAAGACCATCAGGGCCGAGGACGTGCTCTGGG  
*K. daigremontiana* ATGCCAAGCATGAGCAGAGGAAGACCATCAGGGCTGAGGACGTGCTTTGGG  
*K. tubiflora* GTGCCAGCATGAGCAGAGGAAGACCCTCAGGGCTGAGGACGTGCTCTGGG  
*K. beauverdii* GTGCCAGCATGAGCAGAGGAAGACC-----G  
*K. gastronisbonnieri* GTGCCAGCATGAGCAGAGGAAGACCCTCAGGGCTGAGGACGTGCTCTGGG  
*K. streptantha* GTGTCAAGCAGGAGCAGCGGAAGACCATCAGGGCCGAGGACGTGCTTTGGG  
*K. pinnata* GTGCCAGCATGAACAGAGGAAGACCATCAGGGCTGAGGACGTGCTCTGGG  
*K. prolifera* GTGGCAGCATGAGCAGAGGAAGACCATCAGGGCTGAGGACGTGCTCTGGG  
*K. thyrsoflora* GTGCCAGCATGAGCAGAGGAAGACCATCACTGCCGAGGACGTGCTCTGGG

*A. thaliana* CTATGAGCAAGCTTGGGTTCGATAACTACGTGGACCCTCAACCGTGTTC  
*K. marmorata* CCATGAGCAAGCTCGGGTTCGACGACTACATCGAGCCGCTGACTCTGTAC  
*K. rhombopilosa* CCATGAGCAAGCTCGGGTTTGATGATACATCGAGCCGCTGACTTGTATC  
*K. tomentosa* CCATGAGCAAGCTGGGGTTCGATGACTACATTGAGCCGCTGACTCTGTAC  
*K. daigremontiana* CCATGAGCAAGCTCGGGTTCGACT-----CTGTAC  
*K. tubiflora* CCATGAGCAAGCTCGGGTTCGACT-----CTGTAC  
*K. beauverdii* CCATGAGCAAGCTCGGGTTCGACAACACTACATCGAG-----  
*K. gastronisbonnieri* CCATGAGCAAGCTCGGGTTCGACAACACTACATCGAGCCGCTGAATCTGTAC  
*K. streptantha* CCATGAGCAAGCTCGGGTTTGATGATACATCGAGCCGCTGACTTGTAC  
*K. pinnata* CCATGAGCAAGCTCGGGTTCGACAACACTACATTGAGCCGCTGACTCTGTAC  
*K. prolifera* CCATGAGCAACCTCGGGTTCAACAACACTACATCGAGCCGCTGAATCTGTAC  
*K. thyrsoflora* CCATGAGCAAGCTCGGGTTCGACGACTACATCGAGCCGCTGACTCTATAC

*A. thaliana* ATTAACCGGTACCGTGGATAGAGACCGATCGTGGTTCTGCACCTTAGAGG  
*K. marmorata* CTGCACCGGTACAGGGACATGGAGGGTGACCGCGG---GCGGTACAGAGG  
*K. rhombopilosa* TTGCACCGGTACAGGGACATGGAGGGTGACCGCGG---GCGGTACAGAGG  
*K. tomentosa* TTGCACCGGTACAGGGACATGGAGGGTGACCGCGG---GCCATCAGGGG  
*K. daigremontiana* CTGCACCGTACAGGGACATGGAGGGTGACCGCGG---GCGGTACAGAGG  
*K. tubiflora* CTGCACCGTACAGGGACATGGAGGGTGACCGCGG---GCGGTACAGAGG  
*K. beauverdii* -----CAGAGCATGGAGGGTGACCGCGG---GCGGTACAGAGG  
*K. gastronisbonnieri* CTGCACCGGTACAGGGACATGATGGAGGGTGACCGCAGG---AGCCTCAGAGG  
*K. streptantha* TTGCACCGGTACAGGGACATGGAGGGTGACCGCGG---GCGGTACAGAGG  
*K. pinnata* CTGCACCGGTACAGGCACATGGAAGGTGACCGCGG---GCGGTACAGAGG  
*K. prolifera* CTGCACCGGTACAGGGACATCGAGGGTAAACCGCGG---AGCCTCAGAGG  
*K. thyrsoflora* CTGCACCGGTACAGGGACATGGAGGGTGACCGCGG---TCGCTCAGAGG
