# Supplementary material
Source: PubMed Central journal article supplement (PMC2000513)
Supplement: pnas_0704105104_9.pdf [file pnas_0704105104_9.pdf]

**Table 1. Phenotypes of *KdSTM* down-regulation transgenic lines**

| Downregulated lines \ Plant phenotypes | Plantlets on leaf margins | Roots in place of shoots | Leaf-projection | Thick leaves | Shoots on apical shoots | Axillary shoots | Bifurcated stems | Fused leaves | Petioles rotated 180° |
|----------------------------------------|---------------------------|--------------------------|-----------------|--------------|-------------------------|-----------------|------------------|--------------|-----------------------|
| Kd1                                    | -                         | +                        | +               | +            | +                       | +               | +                | +            | +                     |
| Kd2                                    | +                         | -                        | +               | +            | -                       | -               | -                | -            | -                     |
| Kd3                                    | -                         | +                        | -               | +            | +                       | +               | +                | -            | -                     |
| Kd5                                    | -                         | -                        | -               | +            | +                       | +               | -                | +            | +                     |
| Kd6                                    | -                         | -                        | -               | +            | +                       | +               | +                | +            | +                     |
| Kd8                                    | -                         | +                        | -               | +            | +                       | +               | +                | +            | +                     |
| Kd15                                   | -                         | -                        | -               | +            | +                       | +               | +                | +            | +                     |
| Kd20                                   | -                         | -                        | -               | +            | +                       | +               | +                | +            | +                     |

A total of eight independent lines were determined by the Southern blot analysis. The symbols (+) and (-) indicate presence and absence, respectively of a certain phenotype.
