# Supplementary material
Source: PubMed Central journal article supplement (PMC2000513)
Supplement: pnas_0704105104_10.pdf [file pnas_0704105104_10.pdf]

**Table 1. Variations of the *KdLEC1* gene constructs driven and terminated by the *A. thaliana* *LEC1* promoter and terminator**

| Constructs                                                                        | Number of seeds screened | Desiccation tolerant seeds <sup>a</sup> | Percentage of viable seeds <sup>b</sup> |
|-----------------------------------------------------------------------------------|--------------------------|-----------------------------------------|-----------------------------------------|
| 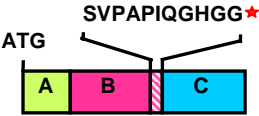 | 4796                     | 0                                       | 0                                       |
|  | 3972                     | 0                                       | 0                                       |
|  | 5520                     | 33                                      | 0.65                                    |

<sup>a</sup>Number of seeds that germinated after drying for two weeks at 28°C. <sup>b</sup>Percentage of viable seeds obtained by suppression of *lec1-1* mutation. 1: Unaltered *KdLEC1* B domain. 2: Mutated *KdLEC1* B domain, where the stop codon was removed from the B domain allowing translation through the C domain. 3: The unique *KdLEC1* B domain amino acids (SVPAPIQGHGGZ) were substituted by the corresponding *A. thaliana* *L1L* B domain specific residues (DYIEPLTLYLHRYR). Red asterisk indicates stop codon.
