# Supplementary material
Source: PubMed Central journal article supplement (PMC2000513)

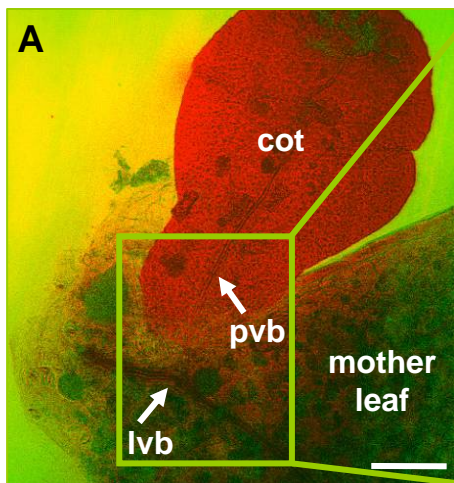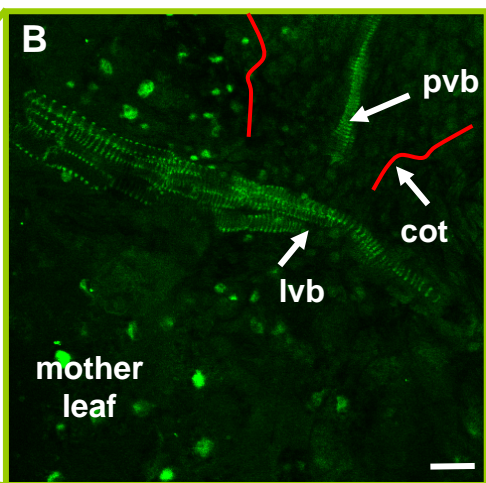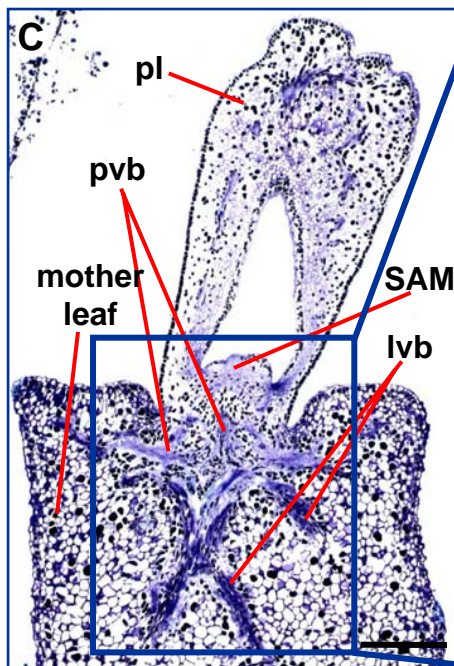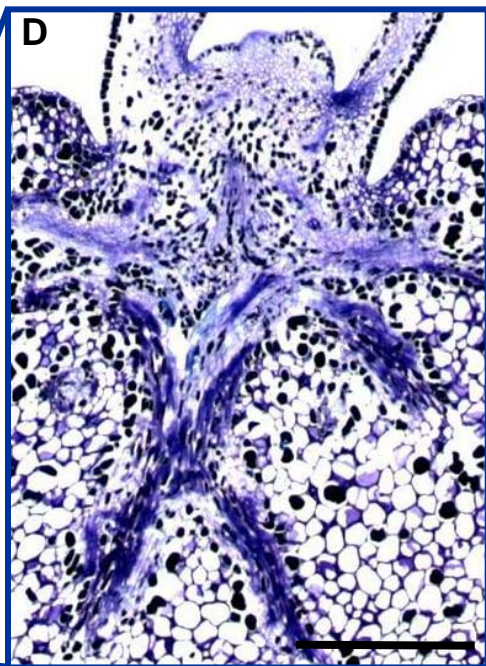

Supplement: pnas_0704105104_1.pdf [file pnas_0704105104_1.pdf]

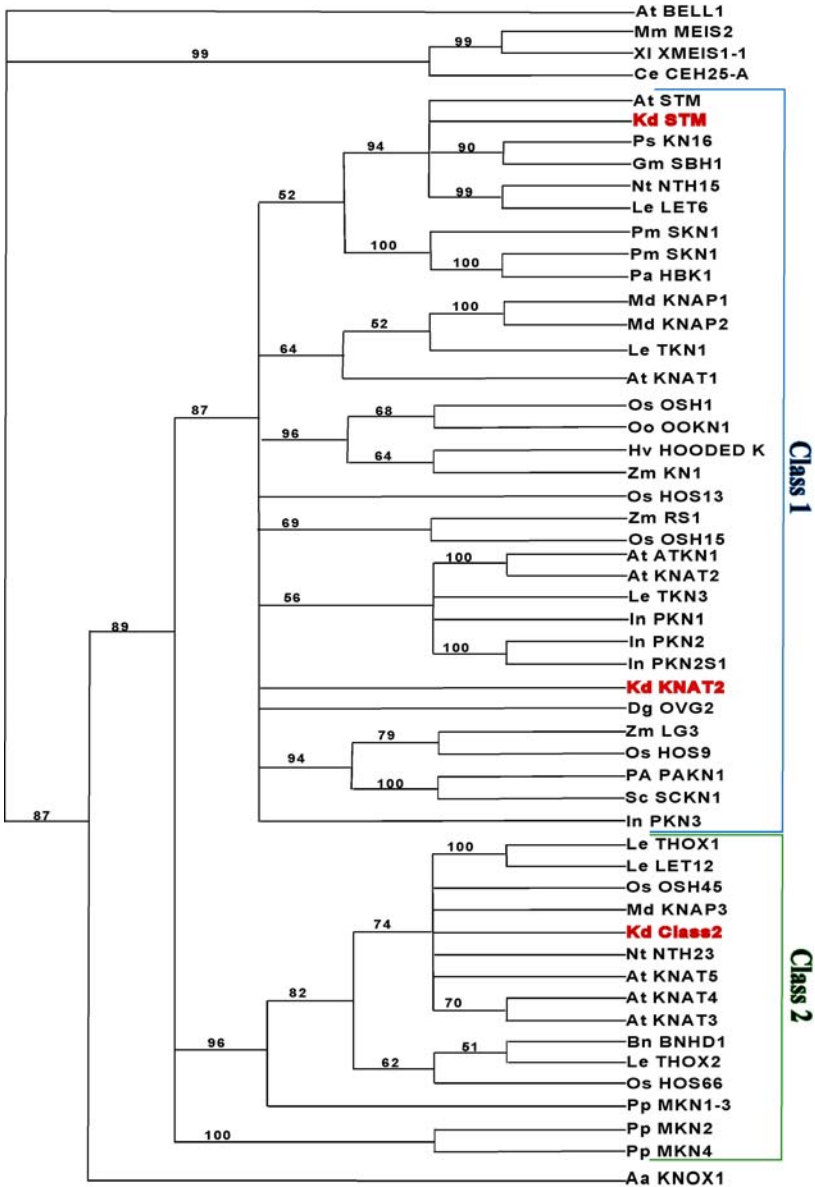

Supplement: pnas_0704105104_2.pdf [file pnas_0704105104_2.pdf]

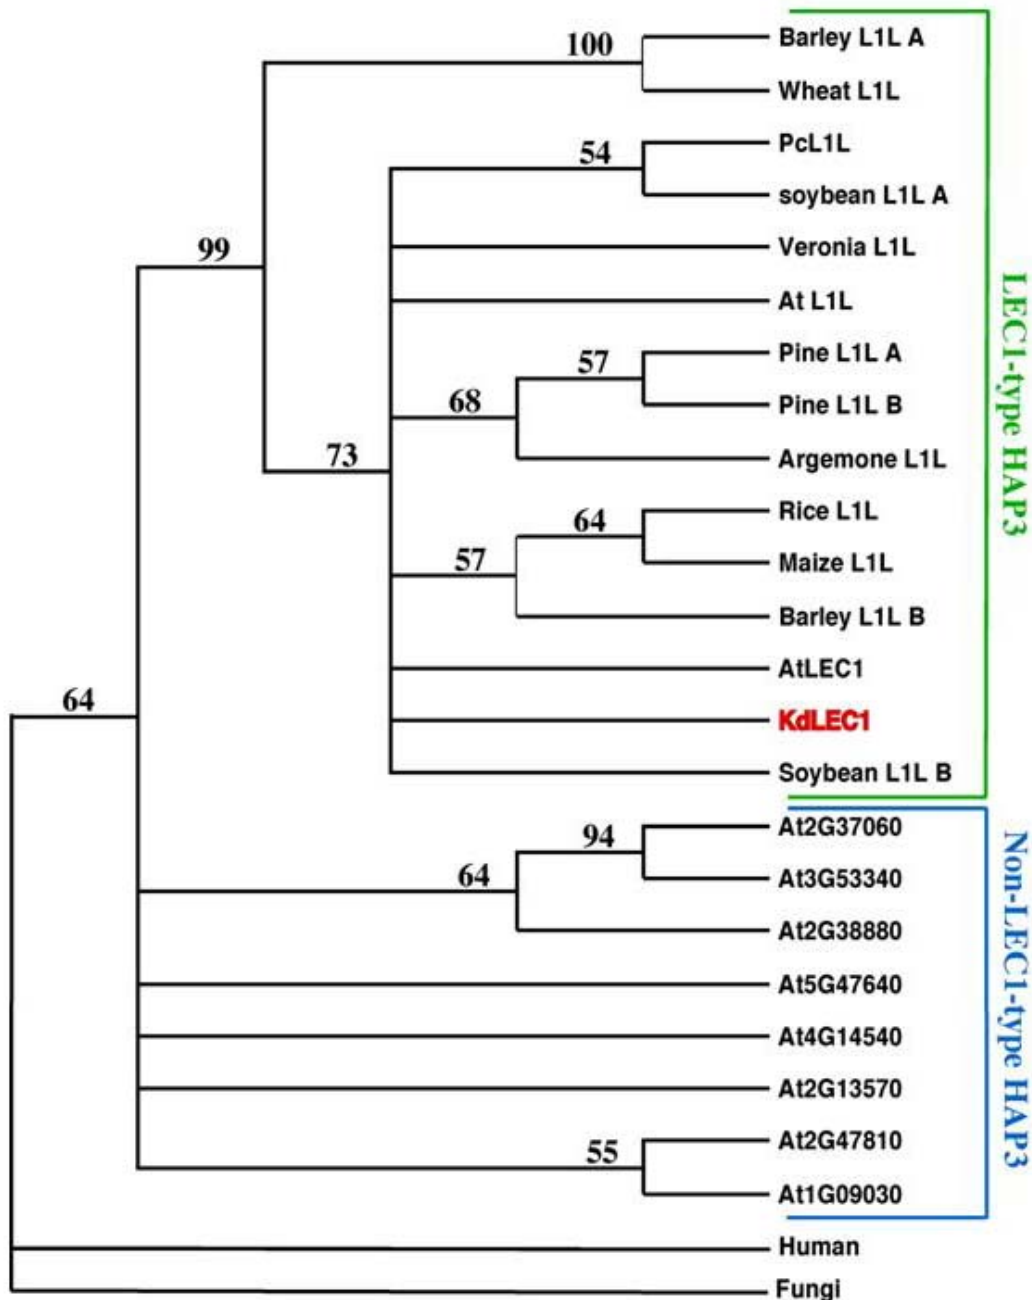

Supplement: pnas_0704105104_3.pdf [file pnas_0704105104_3.pdf]

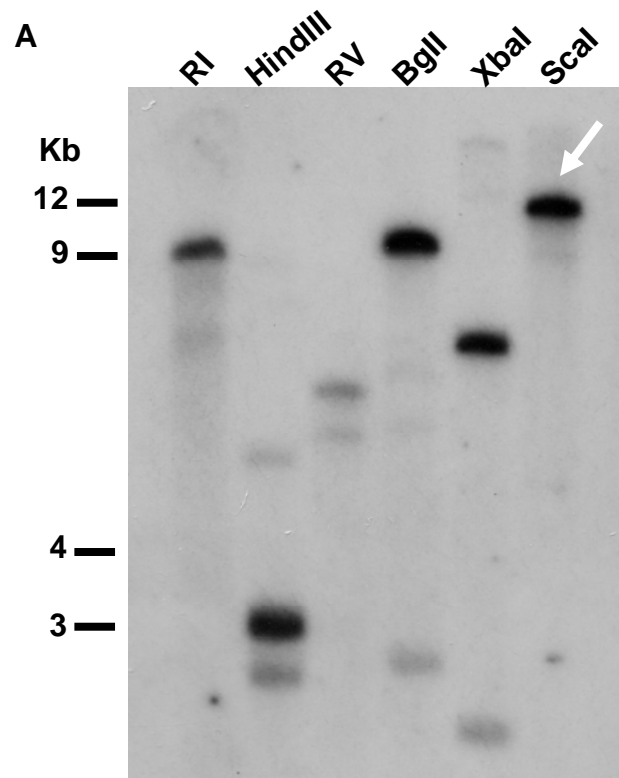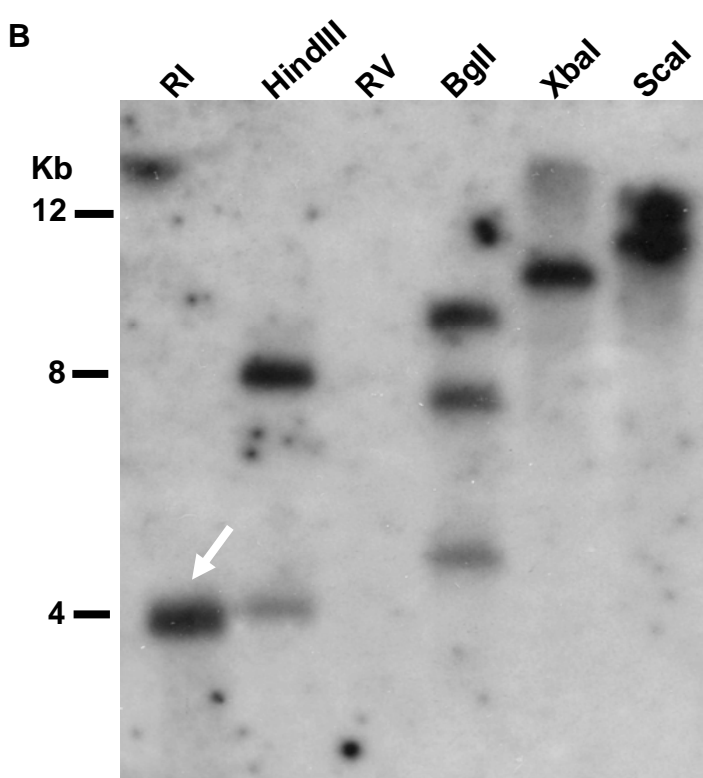

Supplement: pnas_0704105104_5.pdf [file pnas_0704105104_5.pdf]

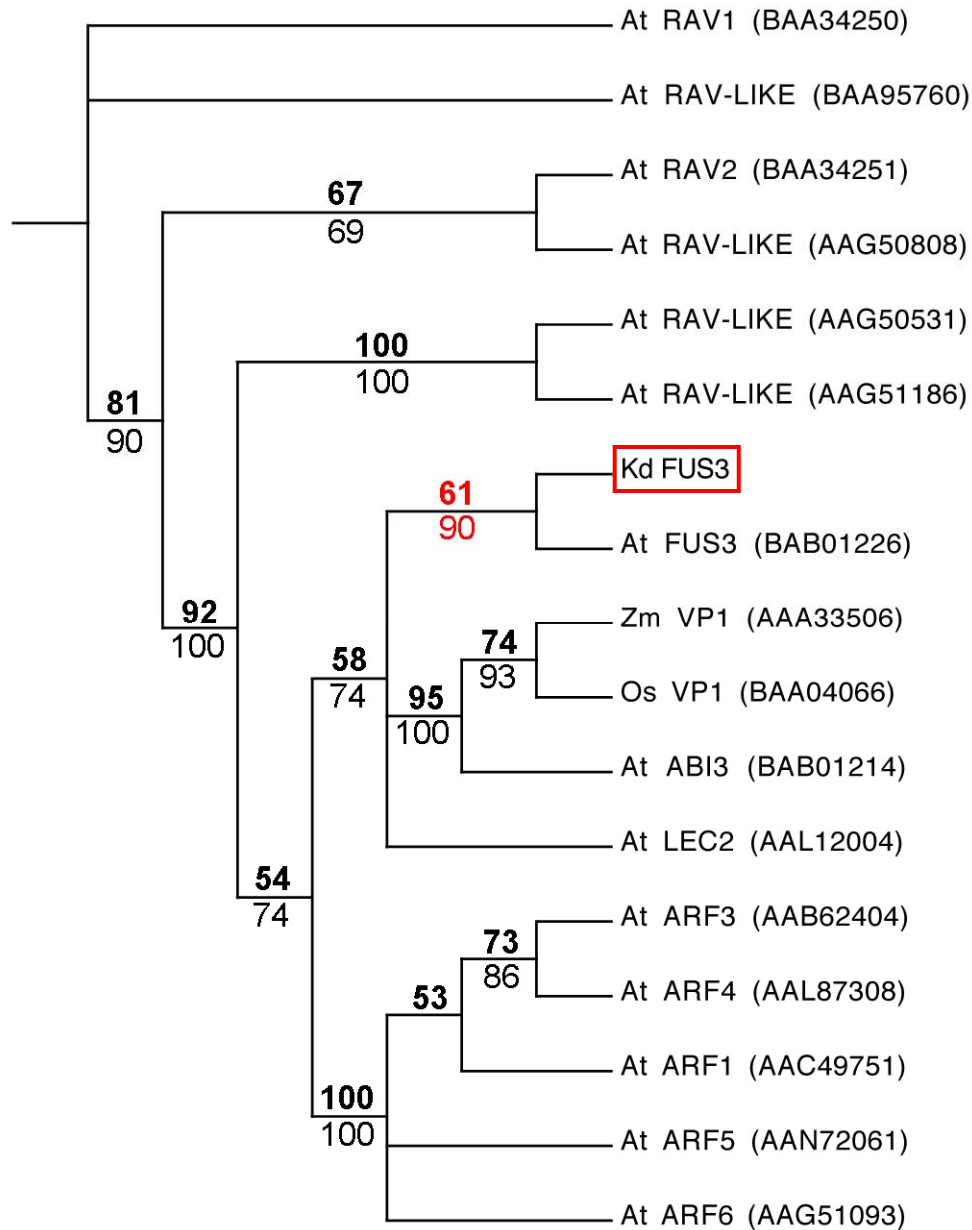

Supplement: pnas_0704105104_6.pdf [file pnas_0704105104_6.pdf]

**A**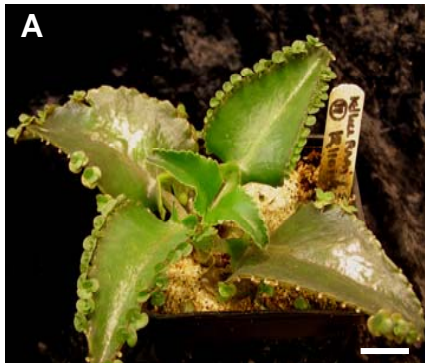**B**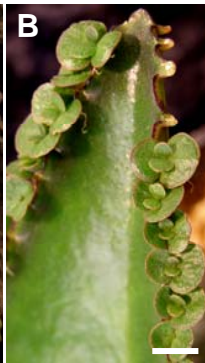**C**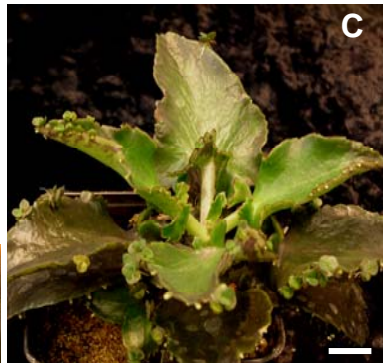

Supplement: pnas_0704105104_7.pdf [file pnas_0704105104_7.pdf]
